# Supplementary material for: Deletion of Rbpj from postnatal endothelium leads to abnormal arteriovenous shunting in mice
Source: Oxford University Press journal article supplement (doi:10.1242/dev.108951), 2014-09-11
Supplement: dev108951_supp.pdf [file dev108951_supp.pdf]

## **Supplementary Materials and Methods**

### **Vascular staining and imaging**

Following FITC-dextran/agarose casting, euthanized mice were placed on ice until casts set.

For imaging and 3D reconstruction, line scans were recorded at 1  $\mu\text{m}$  increments in the z-plane (total z-plane displacement 150-600  $\mu\text{m}$ ). For whole-mount BrdU imaging, z-stacks (0.5  $\mu\text{m}$  increments) were captured.

### **Hypoxia assay**

Briefly, mice were injected intraperitoneally with 60 mg/kg body weight pimonidazole HCl. After 90 minutes, mice were transcardially perfused with 1% PFA; brain tissue was harvested and prepared for cryosectioning. Immunostaining against 1:10 dilution of MAb1 (4.3.11.3 mouse IgG<sub>1</sub> anti-pimonidazole monoclonal antibody; HPI) was performed according to manufacturer's recommendations. VECTASHIELD Mounting Medium with DAPI (Vector Labs) was used. Images were captured using an upright fluorescence microscope (Leica) and SlideBook software.

**Fig. S1. Rbpj was effectively deleted from ECs in *Cdh5(PAC)-CreER<sup>T2</sup>; Rbpj<sup>fx/fx</sup>* brains.**

Rbpj immunohistochemistry following Rbpj<sup>iΔEC</sup> deletion. (A-B) TAM at P1, P2; harvest at P14. (C-D) Adult = TAM at 6 weeks; harvest at 12 weeks. Control EC nuclei (arrowheads in (A,C)) expressed Rbpj; Mutant EC nuclei (arrowheads in (B,D)) lacked Rbpj. For P14, N=4 controls, N=4 mutants. For adult, N=3 controls, N=3 mutants. Nuclei were counterstained with hematoxylin. Scale bars: 50 μm.

**Fig. S2. Schematic of whole mount cortical preparation.**

Cerebral cortex was sliced off with a scalpel and placed in PBS on a wellied microscope slide. Coverslip was applied for imaging; for inverted imaging, PARAFILM held coverslip in place.

**Fig. S3. Method for measuring diameters of AV connections.**

(A-D) mGFP+ ECs are shown in whole mount cerebral cortex. (A) Capillaries (purple outline) lay between arteries/arterioles (a, red outline) and venules/veins (v, blue outline) in the control. (B) Enlarged AV connections (yellow outline) directly connected artery to vein in Rbpj<sup>iΔEC</sup> mice. To generate the graph in Fig. 1G, diameter was measured at a point along each AV connection, as shown in (C-D). Multiple AV connections were measured among multiple fields for each brain. (E-F) Because *Efnb2<sup>tau-lacZ</sup>* staining showed a clear demarcation of: 1) the arterial vs. venous capillary segments in controls, and 2) the AV shunt/arteriole interface in mutants, we measured AV shunts on *Efnb2<sup>tau-lacZ</sup>* stained control and mutant brains. Positions and values for measurements are shown. (G) Quantification of vessel diameters in (E-F). *P*=0.0066. N=4 controls (80 AV connections), N=4 mutants (52 AV connections). Scale bars: 100 μm.

**Fig. S4. Endothelial deletion of Rbpj led to thinner smooth muscle cell layer in intestinal mesentery and increased pericyte coverage in intestinal submucosa at P14.**

(A-B) Immunostaining against  $\alpha$ -SMA revealed that the smooth muscle cell layer surrounding endothelium was thinner in sections through mutant intestinal mesentery. Quantified in (E, upper).  $P=0.0117$ . N=5 controls (40 arteries), N=5 mutants (29 arteries). (C-D) Immunostaining against CD13 indicated that pericyte coverage was increased in sections through intestinal submucosa. Quantified in (E, lower).  $P=0.0119$ . N=3 controls (30 fields), N=3 mutants (30 fields). Scale bars: (A-D) 50  $\mu$ m. a, artery; v, vein.

**Fig. S5. Endothelial deletion of Rbpj did not alter smooth muscle cell coverage or pericyte coverage in myocardium at P14.**

(A-B) Immunostaining against  $\alpha$ -SMA revealed that the smooth muscle cell layer surrounding endothelium was not altered in sections through myocardium. Quantified in (E).  $P=0.5158$ . N=3 controls (6 arteries), N=3 mutants (9 arteries). Immunostaining against CD13 indicated that pericyte coverage was not increased in sections through myocardium. Quantified in (F).  $P=0.1100$ . N=3 controls (30 fields), N=3 mutants (30 fields). Scale bars: (A-B) 200  $\mu$ m; (C-D) 50  $\mu$ m. a, artery; v, vein.

**Movie 1. 3D reconstruction of ~100  $\mu$ m Z-stack from P14 control cerebrovasculature using 2PEFM.**

**Movie 2. 3D reconstruction of ~100  $\mu$ m Z-stack from P14 Rbpj<sup>iAEC</sup> cerebrovasculature using 2PEFM.**

**Movie 3. 3D reconstruction of ~100  $\mu$ m Z-stack from P14 control forebrain using 2PEFM.**

**Movie 4. 3D reconstruction of ~100  $\mu$ m Z-stack from P14 Rbpj<sup>iAEC</sup> forebrain using 2PEFM.**

**Movie 5. 3D reconstruction of ~100  $\mu$ m Z-stack from P14 control cerebellum using 2PEFM.**

**Movie 6. 3D reconstruction of ~100  $\mu$ m Z-stack from P14 Rbpj<sup>i $\Delta$ EC</sup> cerebellum using 2PEFM.**

**Movie 7. Mice exhibited impaired gross motor coordination at P14 following deletion of endothelial Rbpj from birth.**

Movie clip begins with a P14 control mouse on the left, and its Rbpj<sup>i $\Delta$ EC</sup> littermate on the right. As compared to the control, the Rbpj<sup>i $\Delta$ EC</sup> mouse was slow to initiate movement and walked unsteadily.

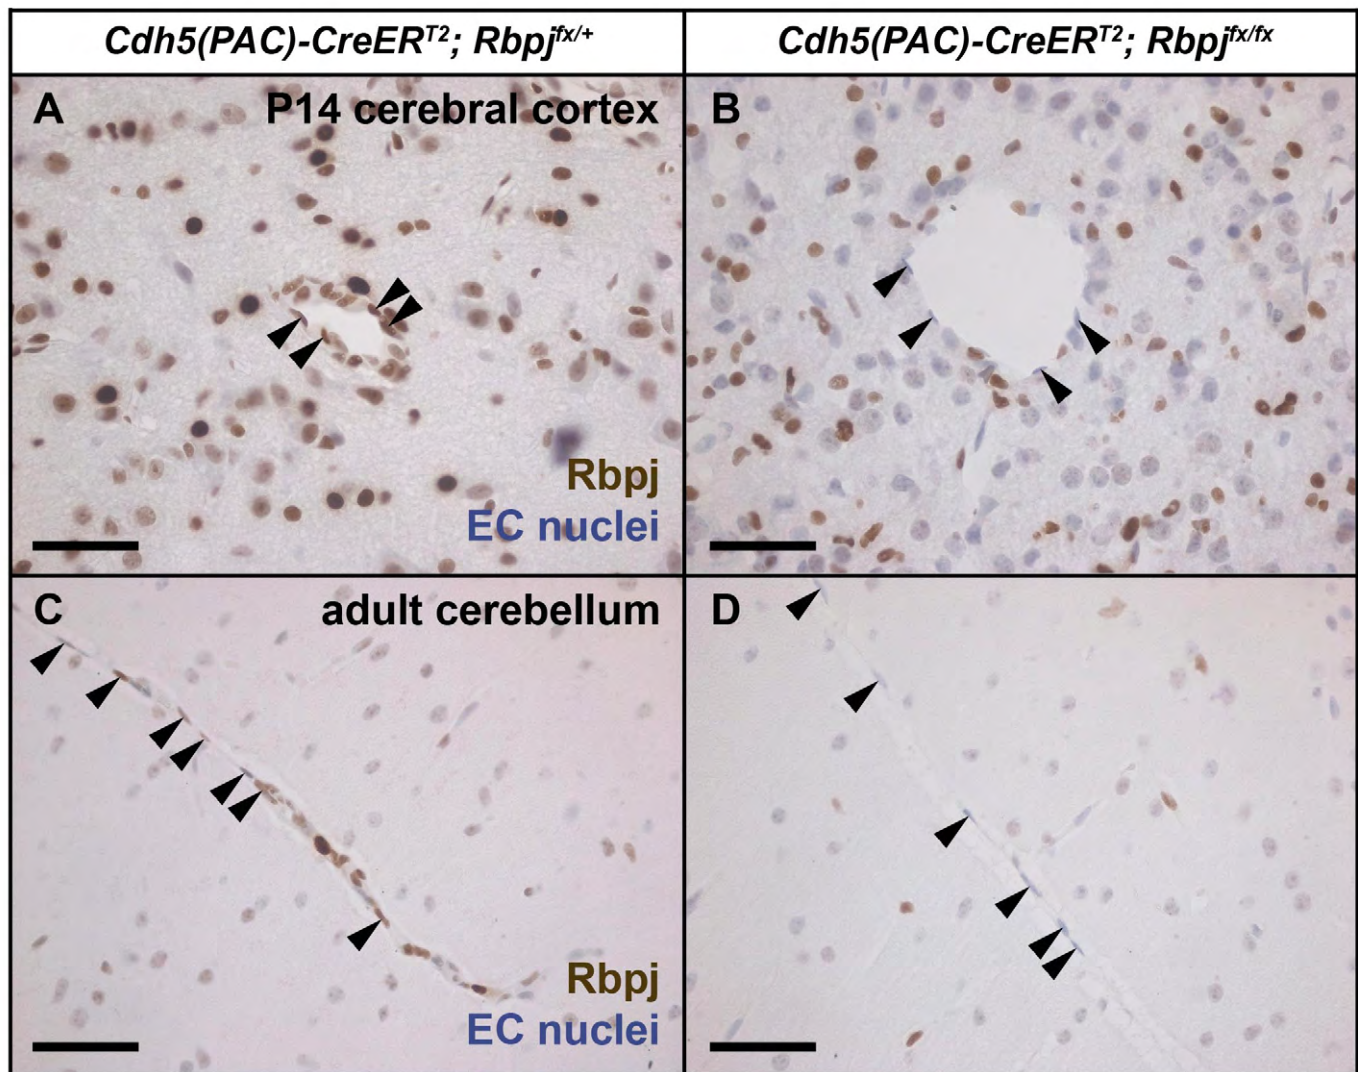

**Figure S1**

## cerebral cortex preparation

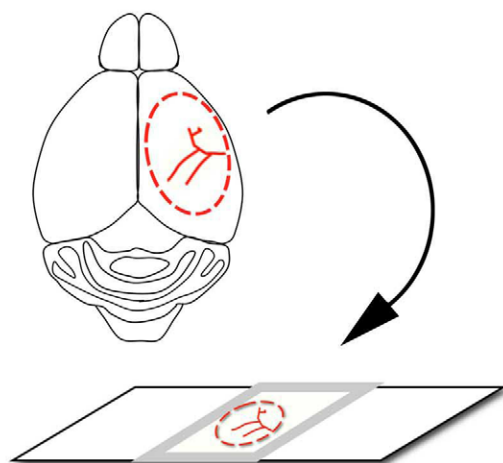

**Figure S2**



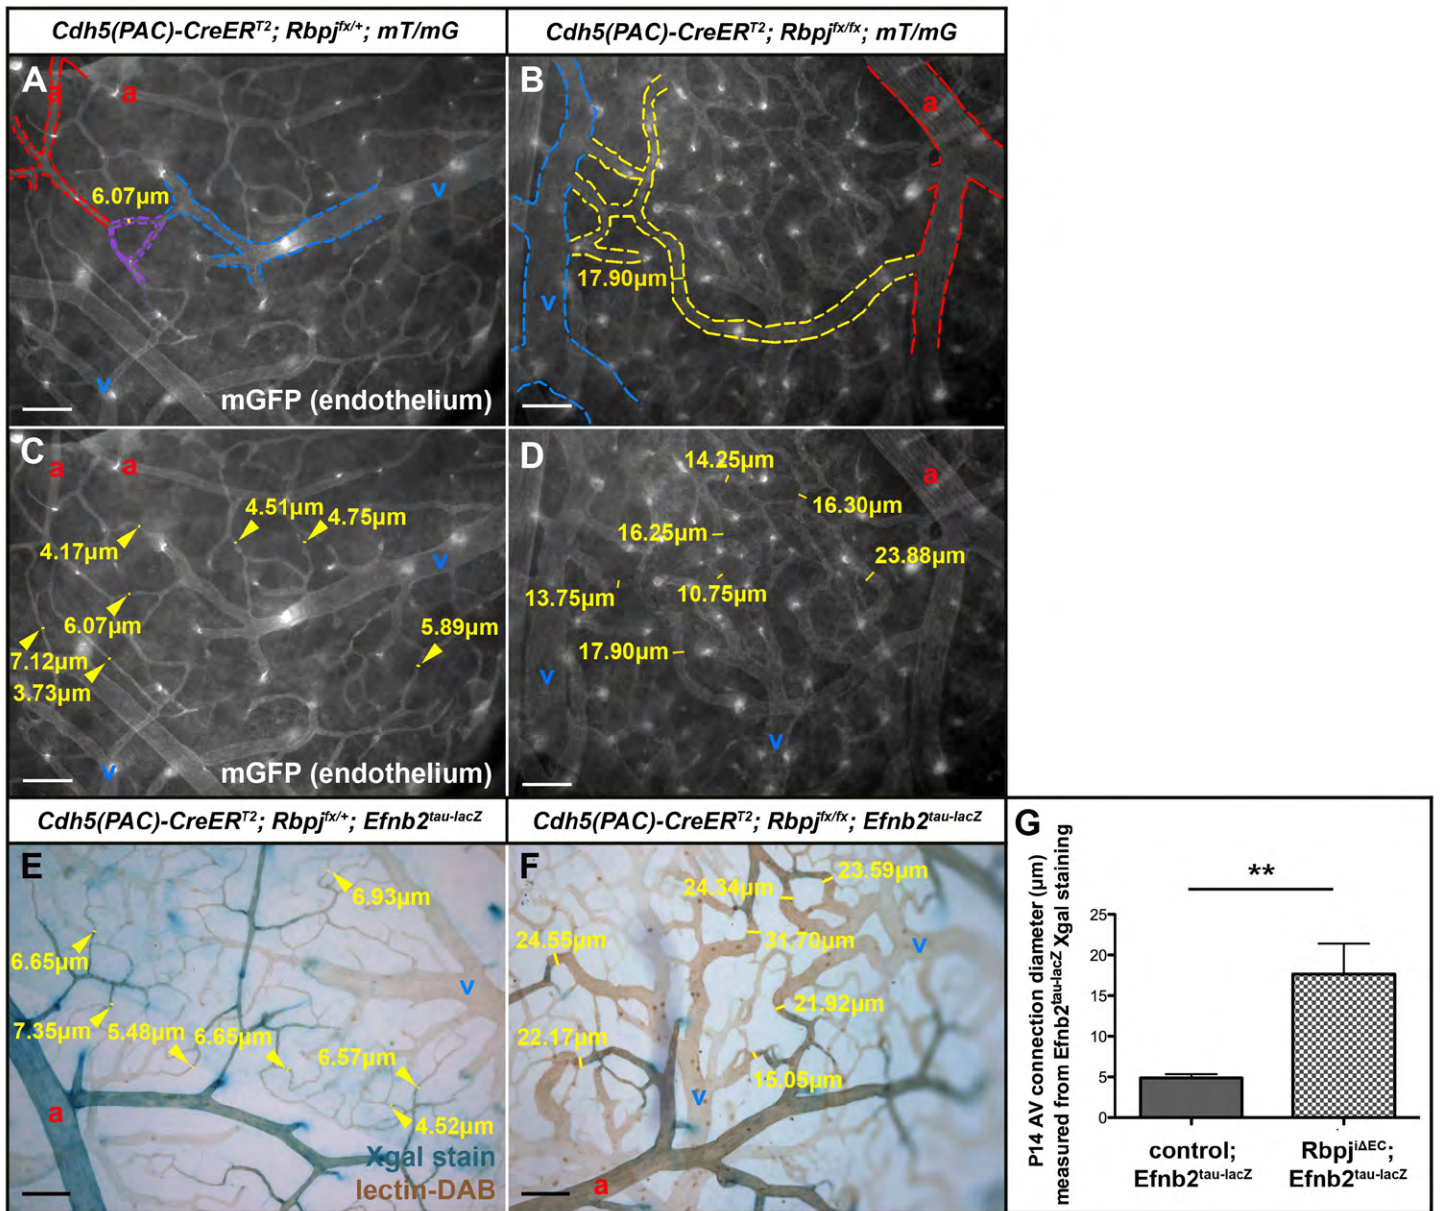

**Figure S3**

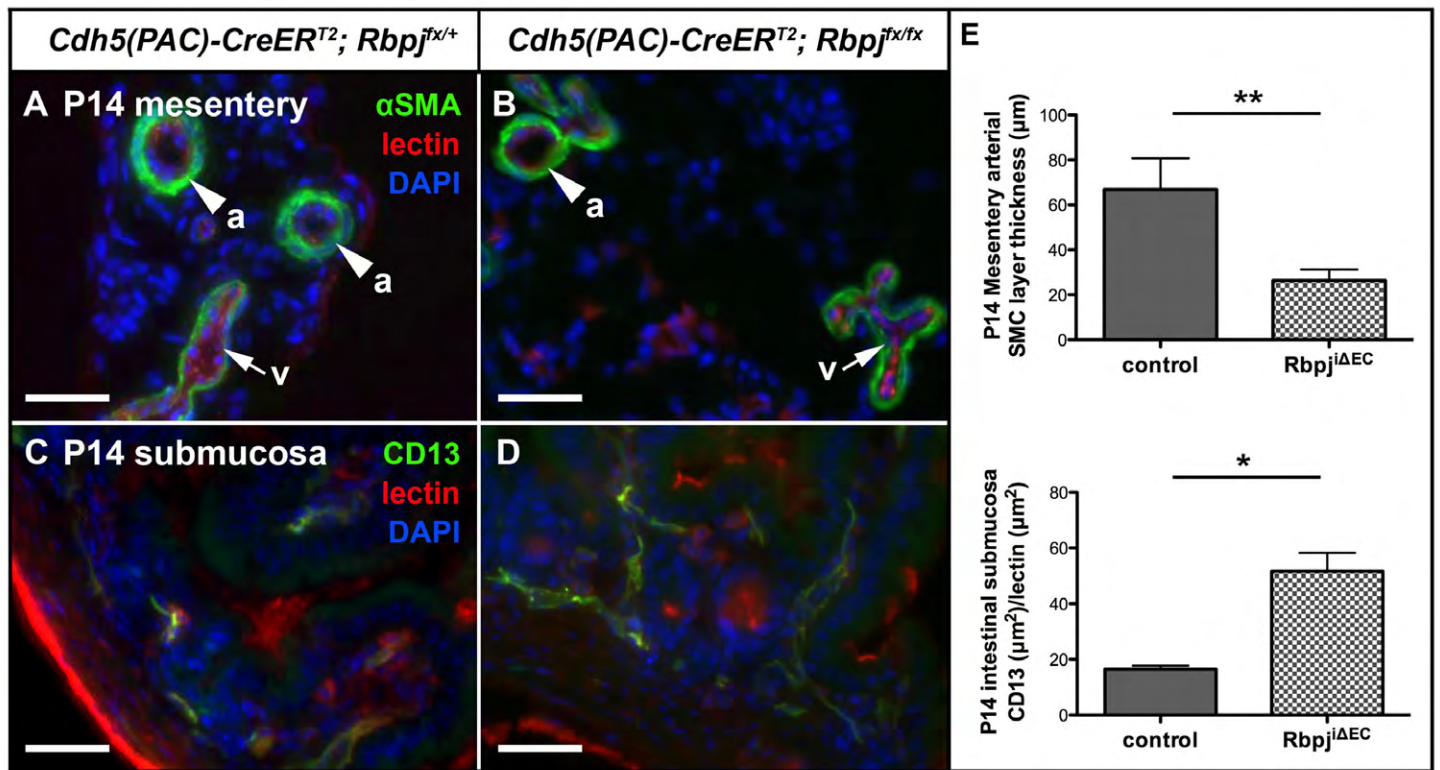

Figure S4



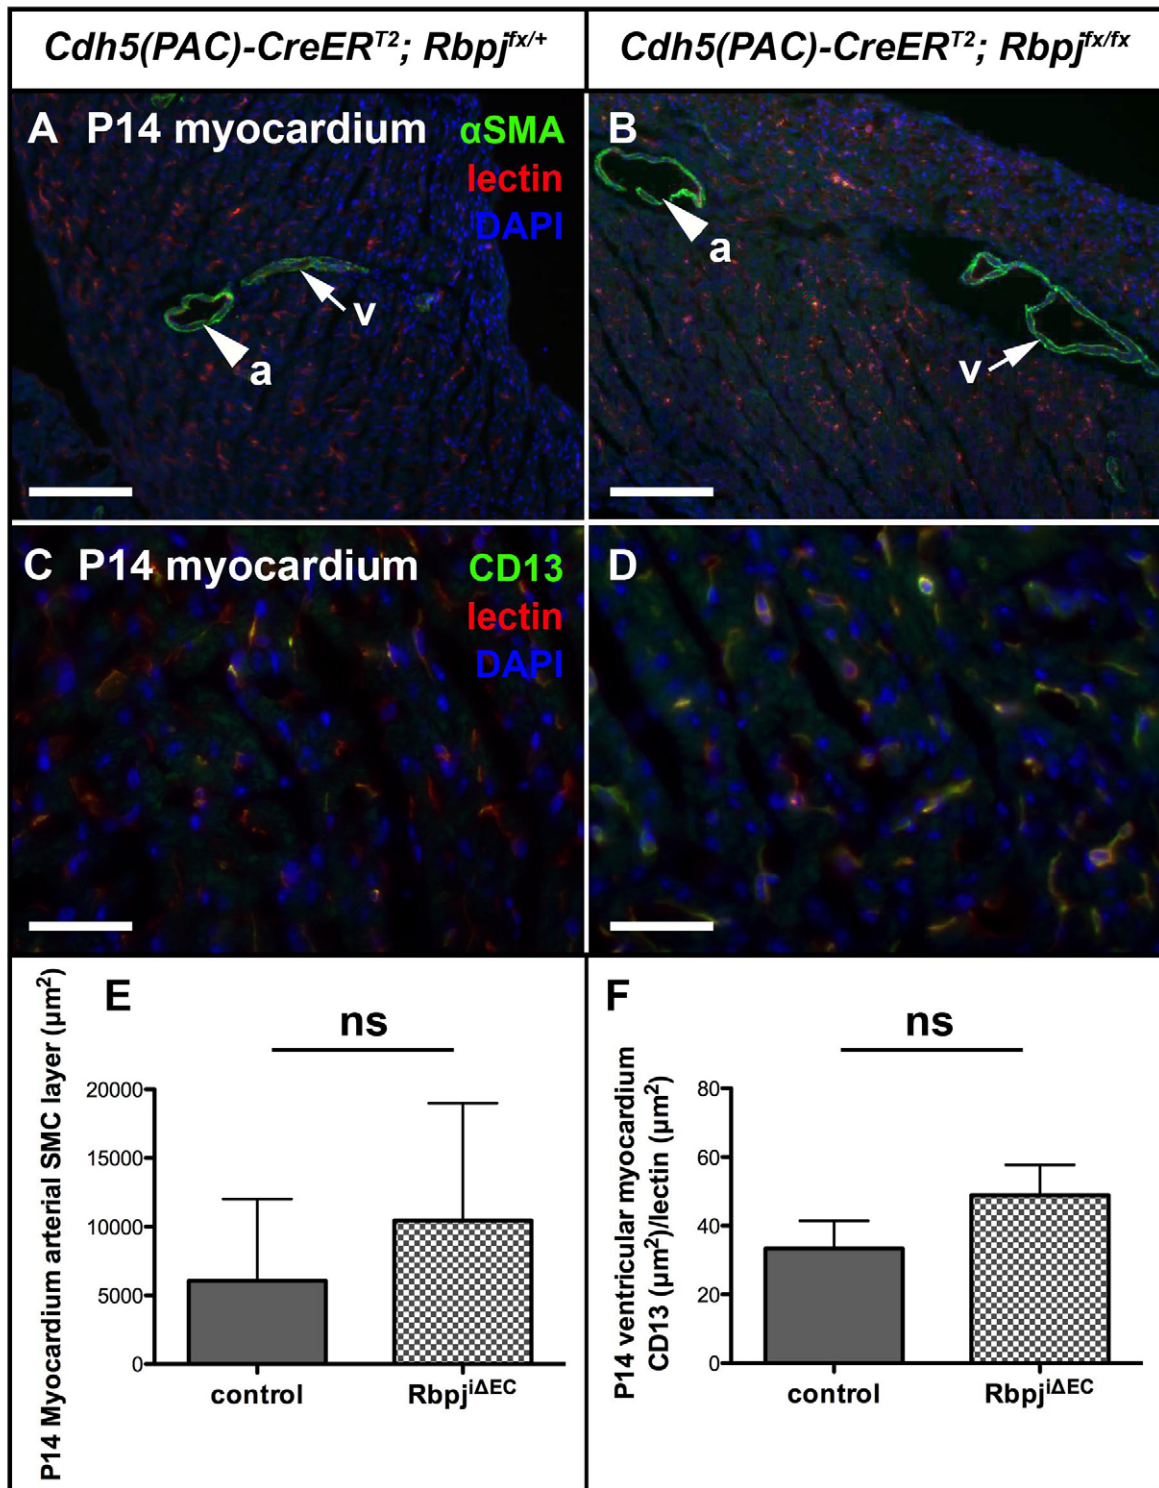

Figure S5

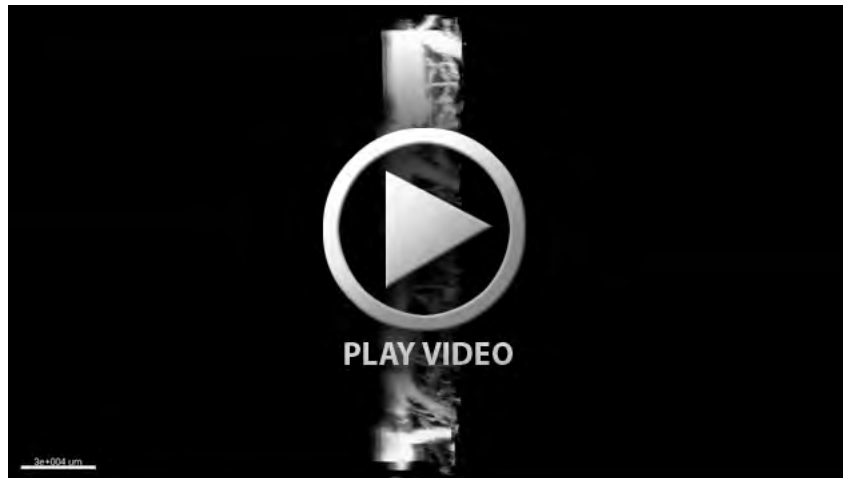

**Movie 1.**

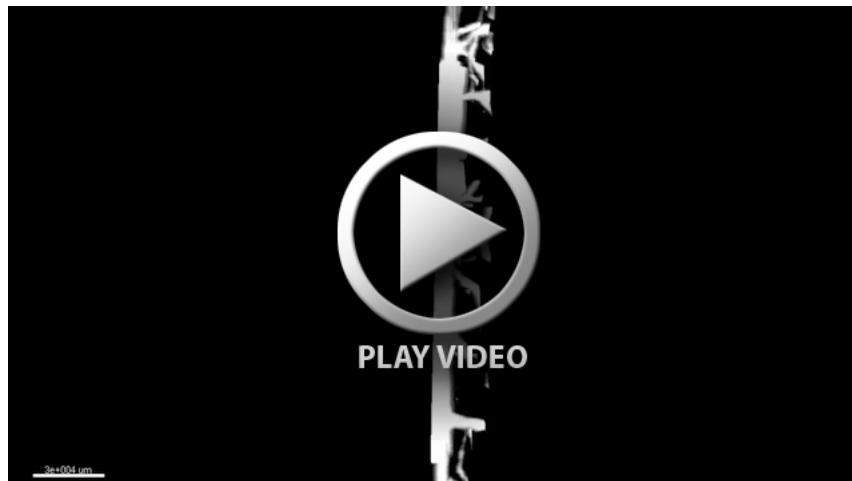

**Movie 2.**

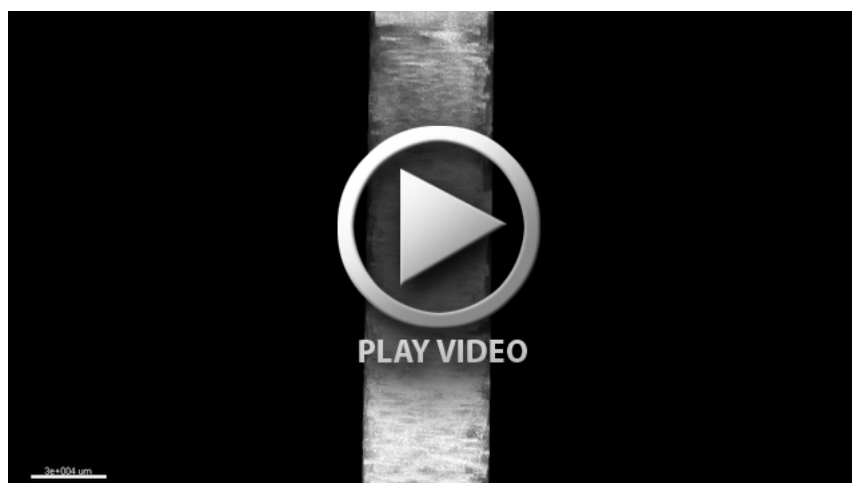

**Movie 3.**

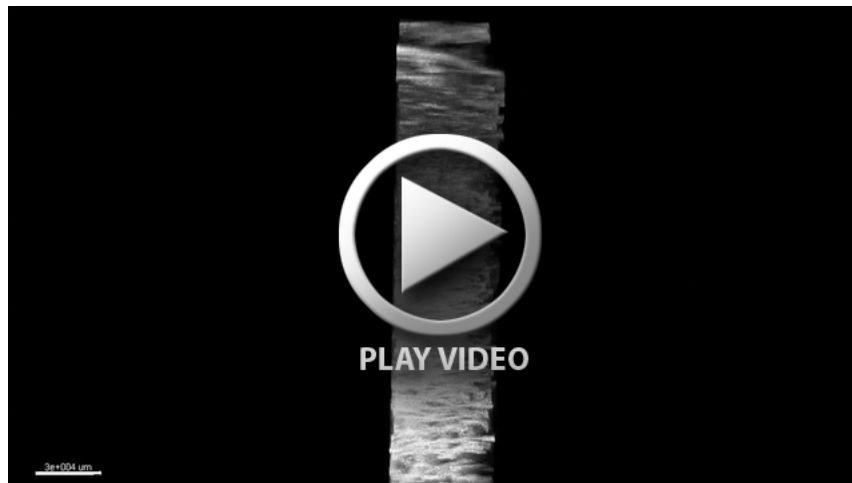

**Movie 4.**

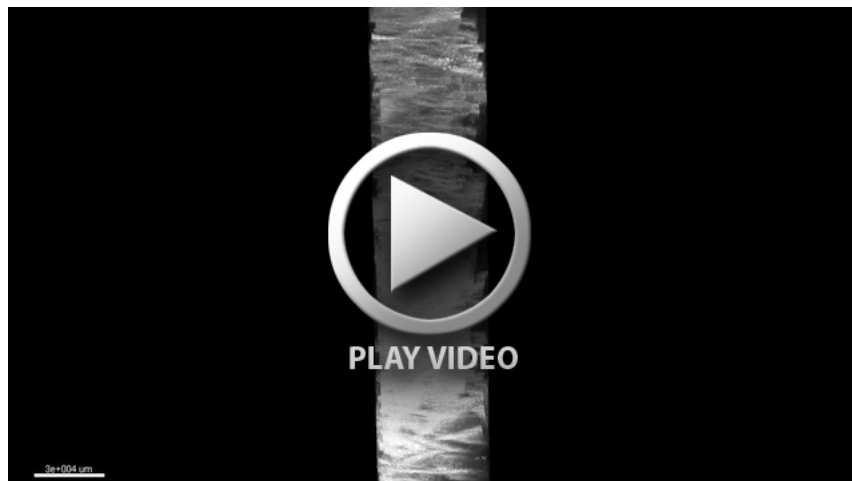

**Movie 5.**

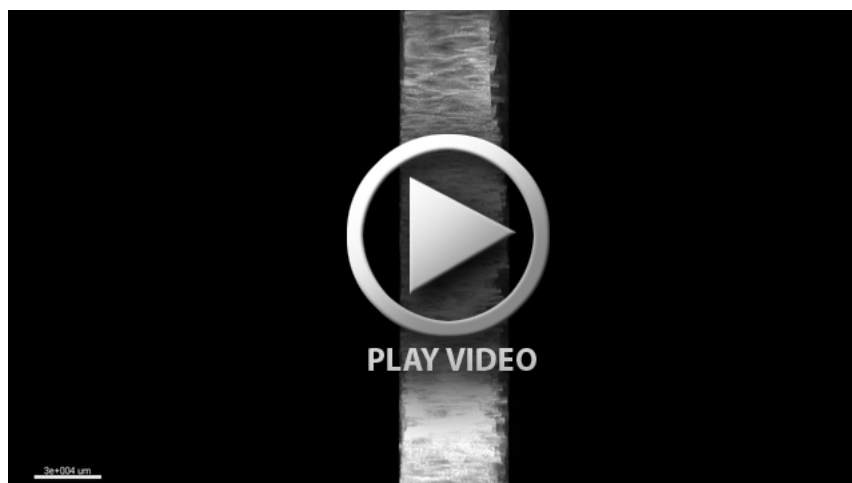

**Movie 6.**

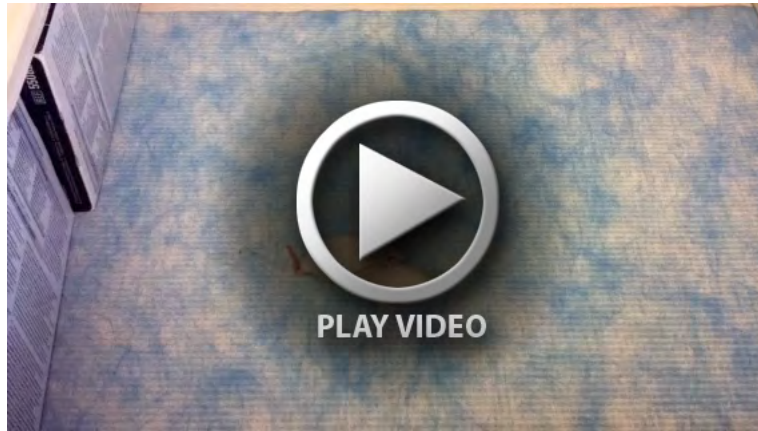

**Movie 7.**

**Table S1. Primers used for quantitative RT-PCR**

| <b>Mouse gene</b> | <b>Direction</b> | <b>Primer sequence</b>     |
|-------------------|------------------|----------------------------|
| <i>Cdh5</i>       | forward          | CGCCAAAAGAGAGACTGGAT       |
|                   | reverse          | CGTTGGACTTGATCTTTCCC       |
| <i>Efnb2</i>      | forward          | TCTTTGGAGGGCCTGGATAAC      |
|                   | reverse          | CATCTCCTGCACGATGTACAC      |
| <i>Ephb4</i>      | forward          | CCTCTGATCCACCTACACAA       |
|                   | reverse          | ATGACCTCCACATGACGA         |
| <i>Hey1</i>       | forward          | CTTGCAGATGACCGTGGA         |
|                   | reverse          | GTGAGGCATTCCCGAAAC         |
| <i>Hey2</i>       | forward          | TGAAGATGCTCCAGGCTACA       |
|                   | reverse          | CACTCTCGGAATCCAATGCT       |
| <i>Pai1</i>       | forward          | GCTGGTGAATGCCCTCTAC        |
|                   | reverse          | GGCAGCCTGGTCATGTTG         |
| <i>Rasa1</i>      | forward          | TCCTTAGTCAGACAAATGTTGTCAAT |
|                   | reverse          | AAACAAGAAACGTGACTGTAATAACC |
| <i>Smad4</i>      | forward          | GGAATAGCTCCAGCCATCAG       |
|                   | reverse          | AGCCCTTCACAAAGCTCATC       |
| <i>Tgfb1</i>      | forward          | TGACGTCACTGGAGTTGTACGG     |
|                   | reverse          | GGTTCATGTCATGGATGGTGC      |
| <i>Vegfa</i>      | forward          | ACGTACTTGCAGATGTGACAAGCC   |
|                   | reverse          | AAGTGCTCCTCGAAGAGTCTCCT    |
